# Supplementary material
Source: PubMed Central journal article supplement (PMC6052225)
Supplement: supp_RA118.002752_136470_1_supp_121787_p7c5kz.pdf [file supp_RA118.002752_136470_1_supp_121787_p7c5kz.pdf]

**A**

| Diseases or Functions Annotation           | p-Value  |
|--------------------------------------------|----------|
| <b>Cellular infiltration by leukocytes</b> | 2.32E-10 |
| Adhesion of monocytes                      | 2.42E-10 |
| Recruitment of leukocytes                  | 4.45E-10 |
| Attraction of leukocytes                   | 1.86E-09 |
| Infiltration by neutrophils                | 1.99E-09 |
| Cell movement of neutrophils               | 2.4E-09  |
| Cellular infiltration                      | 2.8E-09  |
| Cell movement of granulocytes              | 3.83E-09 |
| Cellular infiltration by phagocytes        | 3.94E-09 |

**B**

| Upstream regulator | Predicted State | P value  |
|--------------------|-----------------|----------|
| ERK1/2             | Activated       | 9.04E-13 |
| IRF1               | Activated       | 4.21E-11 |
| IL1RN              | Inhibited       | 4.61E-11 |
| <b>TLR3</b>        | Activated       | 4.94E-11 |
| IL10               | Inhibited       | 9.04E-11 |
| RELA               | Activated       | 1.2E-10  |
| TICAM1             | Activated       | 2.44E-10 |
| STAT3              | Activated       | 2.77E-10 |
| Vegf               | Activated       | 4.3E-10  |

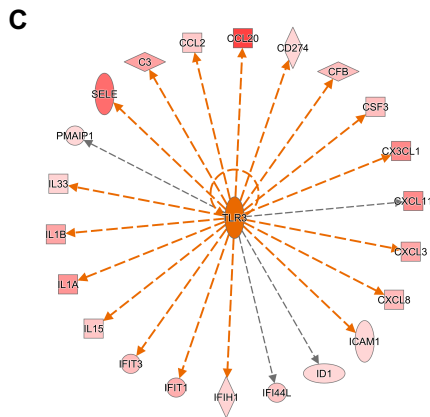

**Supplemental Figure 1. Ingenuity Pathway Analysis of LPC-induced genes in HAECs.** A. Top 10 disease or function pathways upregulated by LPI determined by Ingenuity Pathway Analysis (IPA). B. Top 10 predicated upstream regulators of LPI in ECs determined by IPA. C. The 20 TLR3-regulated genes that are significantly induced by LPI in HAECs.

| A            |                 |         | B            |                 |         |
|--------------|-----------------|---------|--------------|-----------------|---------|
| Upstream TFs | Predicted State | P value | Upstream TFs | Predicted State | P value |
| IRF1         | Activated       | 4.2E-11 | SREBF2       | Activated       | 6.3E-25 |
| RELA         | Activated       | 1.2E-10 | SREBF1       | Activated       | 9.5E-15 |
| STAT3        | Activated       | 2.8E-10 | SIRT2        | Activated       | 6.6E-09 |
| NFKBIE       |                 | 4.1E-09 | TP53         |                 | 5.9E-08 |
| STAT1        | Activated       | 4.1E-09 | MEOX2        | Inhibited       | 6.2E-08 |
| MEOX2        | Inhibited       | 1.2E-08 | PPARGC1B     |                 | 3.2E-07 |
| HMGB1        | Activated       | 1.3E-08 | NFKBIE       |                 | 1.4E-06 |
| NFKB1        |                 | 1.4E-07 | CREB1        |                 | 2.3E-06 |
| JUN          | Activated       | 2.2E-06 | JUN          | Activated       | 7.3E-06 |
| WWTR1        |                 | 3.9E-06 | NFKBIB       | Activated       | 8.2E-06 |
| NFKBIA       |                 | 4.6E-06 | TWIST1       |                 | 9.9E-06 |
| IRF3         | Activated       | 6.0E-06 | CREM         |                 | 9.9E-06 |
| SMAD3        | Activated       | 9.8E-06 | TSC22D3      | Inhibited       | 1.4E-05 |
| FOXO1        | Activated       | 1.2E-05 | RELA         | Activated       | 3.8E-05 |
| ZFP36        | Inhibited       | 1.5E-05 | NFYB         |                 | 3.9E-05 |
| SP1          | Activated       | 2.1E-05 | CTNNB1       |                 | 5.1E-05 |
| NFKBIB       |                 | 3.0E-05 | NFKBIA       |                 | 5.1E-05 |
| SMAD4        |                 | 3.4E-05 | FOXO1        |                 | 5.3E-05 |
| RCAN1        |                 | 6.2E-05 | NFKB1        |                 | 6.3E-05 |
| BCL3         |                 | 6.5E-05 | HMGB1        | Activated       | 6.3E-05 |

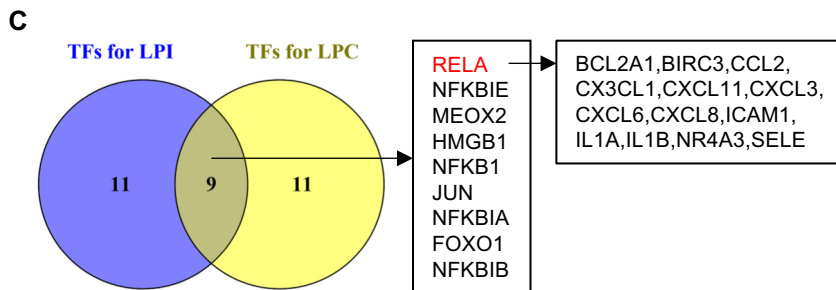

**Supplemental Figure 2. Upstream transcription factor analysis of the genes induced by LPI and LPC in HAECs.**

A. Top 20 predicted upstream transcription regulators of LPI in HAECs as determined by Ingenuity Pathway Analysis (IPA).  
 B. Top 20 predicted upstream transcription factors (TFs) of LPC in HAECs as determined by IPA. C. Left & Middle: Venn diagram showing 9 predicted co-upregulated transcription regulators by LPI and LPC using IPA. Right, The 13 RELA-regulated genes that are significantly induced by LPI and LPC in HAECs were shown.

**Supplemental Table 1. Gene expression changes of cytokines after LPC/LPI stimulation in HAECs.** Red-colored numbers indicate gene expression fold changes that are more than 1.4 folds. FC, fold change.

| Gene ID | Symbol   | Entrez Gene Name            | LPC FC | LPI FC |
|---------|----------|-----------------------------|--------|--------|
| 970     | CD70     | CD70 molecule               | 2.92   | 1.27   |
| 1435    | CSF1     | colony stimulating factor 1 | -1.07  | -1.10  |
| 1437    | CSF2     | colony stimulating factor 2 | 1      | 2.11   |
| 1440    | CSF3     | colony stimulating factor 3 | -1.28  | 1.78   |
| 3458    | IFNG     | interferon gamma            | 1.00   | 1.00   |
| 3586    | IL10     | interleukin 10              | 1      | 1      |
| 3592    | IL12A    | interleukin 12A             | 1.40   | 1.26   |
| 3593    | IL12B    | interleukin 12B             | 1      | 1.02   |
| 3600    | IL15     | interleukin 15              | -2.08  | 1.65   |
| 3603    | IL16     | interleukin 16              | 1.20   | 1.98   |
| 3605    | IL17A    | interleukin 17A             | 1      | 1      |
| 3552    | IL1A     | interleukin 1 alpha         | 1.43   | 2.57   |
| 3553    | IL1B     | interleukin 1 beta          | 1.85   | 2.21   |
| 11009   | IL24     | interleukin 24              | 1      | 1.66   |
| 246778  | IL27     | interleukin 27              | 1      | 1      |
| 9235    | IL32     | interleukin 32              | 2.70   | 1.02   |
| 90865   | IL33     | interleukin 33              | -1.84  | 1.47   |
| 27178   | IL37     | interleukin 37              | -∞     | 1.54   |
| 3565    | IL4      | interleukin 4               | 1      | 1      |
| 3569    | IL6      | interleukin 6               | 1.12   | -1.28  |
| 3574    | IL7      | interleukin 7               | 1.43   | -1.39  |
| 4049    | LTA      | lymphotoxin alpha           | 1      | -1.61  |
| 4050    | LTB      | lymphotoxin beta            | 1      | 2.39   |
| 7124    | TNF      | tumor necrosis factor       | 1      | 1      |
| 8741    | TNFSF13  | TNF superfamily member 13   | 1.54   | -1.15  |
| 10673   | TNFSF13B | TNF superfamily member 13b  | ∞      | -2.67  |
| 9966    | TNFSF15  | TNF superfamily member 15   | 1.79   | 2.64   |

**Supplemental Table 2. Gene expression changes of chemokines after LPC/LPI stimulation in HAECs.** Red-colored numbers indicate gene expression fold changes that are more than 1.4 folds. FC, fold change.

| Gene ID | Symbol | Class | Entrez Gene Name                | LPC FC | LPI FC |
|---------|--------|-------|---------------------------------|--------|--------|
| 6346    | CCL1   | Beta  | C-C motif chemokine ligand 1    | 1      | 1      |
| 6347    | CCL2   | Beta  | C-C motif chemokine ligand 2    | 1.78   | 1.60   |
| 6348    | CCL3   | Beta  | C-C motif chemokine ligand 3    | 1      | 1      |
| 6351    | CCL4   | Beta  | C-C motif chemokine ligand 4    | 1      | 1      |
| 6352    | CCL5   | Beta  | C-C motif chemokine ligand 5    | 1      | -1.12  |
| 6354    | CCL7   | Beta  | C-C motif chemokine ligand 7    | ∞      | 1      |
| 6355    | CCL8   | Beta  | C-C motif chemokine ligand 8    | 1      | 1      |
| 6356    | CCL11  | Beta  | C-C motif chemokine ligand 11   | 1      | 1      |
| 6357    | CCL13  | Beta  | C-C motif chemokine ligand 13   | 1      | 1      |
| 6358    | CCL14  | Beta  | C-C motif chemokine ligand 14   | -1.13  | 1.06   |
| 6359    | CCL15  | Beta  | C-C motif chemokine ligand 15   | 1      | 1.72   |
| 6360    | CCL16  | Beta  | C-C motif chemokine ligand 16   | 1.09   | 1.42   |
| 6361    | CCL17  | Beta  | C-C motif chemokine ligand 17   | 1      | 1      |
| 6362    | CCL18  | Beta  | C-C motif chemokine ligand 18   | 1      | 1      |
| 6363    | CCL19  | Beta  | C-C motif chemokine ligand 19   | 1      | 1      |
| 6364    | CCL20  | Beta  | C-C motif chemokine ligand 20   | -1.03  | 5.46   |
| 6366    | CCL21  | Beta  | C-C motif chemokine ligand 21   | -∞     | 1      |
| 6367    | CCL22  | Beta  | C-C motif chemokine ligand 22   | 1      | 1.06   |
| 6368    | CCL23  | Beta  | C-C motif chemokine ligand 23   | -1.54  | -2.70  |
| 6369    | CCL24  | Beta  | C-C motif chemokine ligand 24   | ∞      | -1.46  |
| 6370    | CCL25  | Beta  | C-C motif chemokine ligand 25   | 1      | 1      |
| 10344   | CCL26  | Beta  | C-C motif chemokine ligand 26   | 1      | 3.08   |
| 10850   | CCL27  | Beta  | C-C motif chemokine ligand 27   | 1      | 1      |
| 56477   | CCL28  | Beta  | C-C motif chemokine ligand 28   | 1.95   | 1.34   |
| 6376    | CX3CL1 | Delta | C-X3-C motif chemokine ligand 1 | 2.03   | 2.85   |
| 2919    | CXCL1  | Alpha | C-X-C motif chemokine ligand 1  | 1.59   | 1.29   |
| 2920    | CXCL2  | Alpha | C-X-C motif chemokine ligand 2  | 1.26   | 1.17   |
| 2921    | CXCL3  | Alpha | C-X-C motif chemokine ligand 3  | 1.46   | 2.18   |
| 6374    | CXCL5  | Alpha | C-X-C motif chemokine ligand 5  | -∞     | 3.29   |
| 6372    | CXCL6  | Alpha | C-X-C motif chemokine ligand 6  | 1.95   | 2.54   |
| 3576    | CXCL8  | Alpha | C-X-C motif chemokine ligand 8  | 1.43   | 1.86   |
| 4283    | CXCL9  | Alpha | C-X-C motif chemokine ligand 9  | 1      | 1      |
| 3627    | CXCL10 | Alpha | C-X-C motif chemokine ligand 10 | 1      | 1      |
| 6373    | CXCL11 | Alpha | C-X-C motif chemokine ligand 11 | 1.78   | 2.80   |
| 6387    | CXCL12 | Alpha | C-X-C motif chemokine ligand 12 | 1.77   | -1.40  |
| 10563   | CXCL13 | Alpha | C-X-C motif chemokine ligand 13 | 1      | 1      |
| 9547    | CXCL14 | Alpha | C-X-C motif chemokine ligand 14 | ∞      | -1.96  |
| 58191   | CXCL16 | Alpha | C-X-C motif chemokine ligand 16 | -1.72  | -1.07  |
| 284340  | CXCL17 | Alpha | C-X-C motif chemokine ligand 17 | 1      | 1      |
| 6375    | XCL1   | Gamma | X-C motif chemokine ligand 1    | 1      | 1      |
| 6846    | XCL2   | Gamma | X-C motif chemokine ligand 2    | 1      | 1      |

**Supplemental Table 3. Gene expression changes of T cell co-stimulation and co-inhibition receptors after LPC/LPI stimulation in HAECs.** Red-colored numbers indicate gene expression fold changes that are more than 1.4 folds. FC, fold change.

| Gene ID | Symbol   | Alias | Entrez Gene Name                                          | LPC FC    | LPI FC |
|---------|----------|-------|-----------------------------------------------------------|-----------|--------|
| 940     | CD28     |       | CD28 molecule                                             | $\infty$  | 1.70   |
| 29851   | ICOS     |       | inducible T-cell co-stimulator                            | 1         | 1      |
| 1493    | CTLA4    |       | cytotoxic T-lymphocyte-associated protein 4               | $-\infty$ | -3.02  |
| 5133    | PDCD1    | PD1   | programmed cell death 1                                   | 1         | 1      |
| 151888  | BTLA     |       | B and T lymphocyte associated                             | 1         | 2.75   |
| 8764    | TNFRSF14 | HVEM  | tumor necrosis factor receptor superfamily, member 14     | 1.11      | -1.35  |
| 939     | CD27     |       | CD27 molecule                                             | 1         | -1.24  |
| 3604    | TNFRSF9  | 41-BB | tumor necrosis factor receptor superfamily, member 9      | 4.38      | 1      |
| 7293    | TNFRSF4  | OX40  | tumor necrosis factor receptor superfamily, member 4      | 1.17      | 1.73   |
| 8718    | TNFRSF25 | DR3   | tumor necrosis factor receptor superfamily, member 25     | 1.12      | -1.21  |
| 8784    | TNFRSF18 | GITR  | tumor necrosis factor receptor superfamily, member 18     | $\infty$  | 1      |
| 943     | TNFRSF8  | CD30  | tumor necrosis factor receptor superfamily, member 8      | $-\infty$ | 1.14   |
| 6504    | SLAMF1   | SLAM  | signaling lymphocytic activation molecule family member 1 | 1         | 1      |
| 914     | CD2      |       | CD2 molecule                                              | 1         | 1      |
| 51744   | CD244    | 2B4   | CD244 molecule, natural killer cell receptor 2B4          | 1         | 1      |
| 26762   | HAVCR1   | TIM1  | hepatitis A virus cellular receptor 1                     | 1         | 2.26   |
| 84868   | HAVCR2   | TIM3  | hepatitis A virus cellular receptor 2                     | 1         | -1.85  |
| 201633  | TIGIT    |       | T cell immunoreceptor with Ig and ITIM domains            | 1         | 1.04   |
| 10666   | CD226    |       | CD226 molecule                                            | 1         | 1.18   |
| 11126   | CD160    |       | CD160 molecule                                            | 1         | 1.36   |
| 3902    | LAG3     |       | lymphocyte-activation gene 3                              | -1.54     | 1.09   |
| 3903    | LAIR1    |       | leukocyte-associated immunoglobulin-like receptor 1       | 1         | 1.62   |
| 941     | CD80     | B7-1  | CD80 molecule                                             | 1         | 1      |
| 29126   | CD274    | B7-H1 | CD274 molecule                                            | 1.39      | 1.43   |

**Supplemental Table 4. Gene expression changes of key regulators in endothelial-mesenchymal transition after LPC/LPI stimulation in HAECs.** Red-colored numbers indicate gene expression fold changes that are more than 1.4 folds. FC, fold change.

| Gene ID | Symbol  | Alias       | Entrez Gene Name                                                  | LPC FC | LPI FC |
|---------|---------|-------------|-------------------------------------------------------------------|--------|--------|
| 3678    | ITGA5   | CD49e       | integrin subunit alpha 5                                          | 1.05   | -1.04  |
| 800     | CALD1   |             | caldesmon 1                                                       | 1.44   | 1.22   |
| 4478    | MSN     |             | moesin                                                            | 1.19   | -1.08  |
| 6695    | SPOCK1  | Testican    | SPARC/osteonectin, cwcw and kazal like domains proteoglycan 1     | -1.07  | -1.01  |
| 6678    | SPARC   | Osteonectin | secreted protein acidic and cysteine rich                         | 1.04   | -1.06  |
| 3685    | ITGAV   | CD51        | integrin subunit alpha V                                          | 1.12   | 1      |
| 79026   | AHNAK   | Desmoyokin  | AHNAK nucleoprotein                                               | -1.41  | -1.14  |
| 4851    | NOTCH1  |             | notch 1                                                           | -1.17  | -1.15  |
| 182     | JAG1    | CD339       | jagged 1                                                          | 1.01   | -1.04  |
| 6583    | SLC22A4 |             | solute carrier family 22 member 4                                 | -1.31  | 1.13   |
| 9839    | ZEB2    | Sip1        | zinc finger E-box binding homeobox 2                              | 1      | 1.07   |
| 7852    | CXCR4   | CD184       | C-X-C motif chemokine receptor 4                                  | 1.09   | -1.03  |
| 6935    | ZEB1    |             | zinc finger E-box binding homeobox 1                              | 1.01   | 1.04   |
| 23493   | HEY2    | CHF1        | hes related family bHLH transcription factor with YRPW motif 2    | 1.04   | 1      |
| 6615    | SNAI1   | SNAIL       | snail family transcriptional repressor 1                          | -1.24  | 1.06   |
| 6591    | SNAI2   | SLUG        | snail family transcriptional repressor 2                          | 1.75   | -1.03  |
| 23462   | HEY1    |             | hes related family bHLH transcription factor with YRPW motif 1    | 1.22   | 1.33   |
| 7291    | TWIST1  | TWIST       | twist family bHLH transcription factor 1                          | -1.03  | 1.21   |
| 81029   | WNT5B   |             | Wnt family member 5B                                              | -1.03  | 1.03   |
| 7481    | WNT11   |             | Wnt family member 11                                              | ∞      | -1.23  |
| 26508   | HEYL    |             | hes related family bHLH transcription factor with YRPW motif-like | 1      | 1      |
| 23230   | VPS13A  |             | vacuolar protein sorting 13 homolog A                             | -1.35  | -1.15  |

**Supplemental Table 5. Gene expression changes of mesenchymal markers after LPC/LPI stimulation in HAECs.** Red-colored numbers indicate gene expression fold changes that are more than 1.4 folds. FC, fold change.

| Gene ID | Symbol   | Alias       | Entrez Gene Name                                           | LPC FC      | LPI FC      |
|---------|----------|-------------|------------------------------------------------------------|-------------|-------------|
| 59      | ACTA2    | aSMA        | actin, alpha 2, smooth muscle, aorta                       | -1.16       | -1.13       |
| 8038    | ADAM12   |             | ADAM metallopeptidase domain 12                            | <b>1.58</b> | 1.35        |
| 57124   | CD248    | Endosialin  | CD248 molecule                                             | 1.00        | 1.12        |
| 960     | CD44     |             | CD44 molecule (Indian blood group)                         | -1.04       | -1.13       |
| 1009    | CDH11    | CAD11       | cadherin 11                                                | 1.12        | -1.03       |
| 1000    | CDH2     | NCAD        | cadherin 2                                                 | 1.04        | 1           |
| 1264    | CNN1     |             | calponin 1                                                 | <b>1.75</b> | -1.61       |
| 1277    | COL1A1   |             | collagen type I alpha 1 chain                              | -3.08       | 1.14        |
| 1278    | COL1A2   |             | collagen type I alpha 2 chain                              | 1.11        | 1           |
| 1281    | COL3A1   |             | collagen type III alpha 1 chain                            | 1.19        | 1           |
| 1289    | COL5A1   |             | collagen type V alpha 1 chain                              | 1.02        | -1.17       |
| 1290    | COL5A2   |             | collagen type V alpha 2 chain                              | 1.10        | -1.02       |
| 1291    | COL6A1   |             | collagen type VI alpha 1 chain                             | 1.01        | -1.09       |
| 1490    | CTGF     | CCN2        | connective tissue growth factor                            | -1.05       | -1.06       |
| 4921    | DDR2     |             | discoidin domain receptor tyrosine kinase 2                | -1.20       | 1.10        |
| 10395   | DLC1     | STARD12     | DLC1 Rho GTPase activating protein                         | -1.07       | 1.05        |
| 2191    | FAP      | DPPIV       | fibroblast activation protein alpha                        | -1.06       | 1.08        |
| 2192    | FBLN1    |             | fibulin 1                                                  | 1.00        | 1.14        |
| 10516   | FBLN5    |             | fibulin 5                                                  | -1.08       | -1.43       |
| 2335    | FN1      |             | fibronectin 1                                              | -1.22       | -1.04       |
| 3486    | IGFBP3   |             | insulin like growth factor binding protein 3               | -1.75       | -1.22       |
| 4323    | MMP14    |             | matrix metallopeptidase 14                                 | 1.01        | -1.13       |
| 4313    | MMP2     |             | matrix metallopeptidase 2                                  | -1.05       | -1.16       |
| 4318    | MMP9     |             | matrix metallopeptidase 9                                  | $\infty$    | -4.03       |
| 4627    | MYH9     | NMHC-IIA    | myosin heavy chain 9                                       | 1.05        | -1.12       |
| 91624   | NEXN     |             | nexilin F-actin binding protein                            | 1.38        | -1.13       |
| 22795   | NID2     |             | nidogen 2                                                  | 1.06        | <b>1.56</b> |
| 4854    | NOTCH3   | CADASIL     | notch 3                                                    | -2.51       | <b>1.44</b> |
| 4907    | NT5E     | CD73        | 5'-nucleotidase ecto                                       | 1.17        | 1.12        |
| 5033    | P4HA1    | P4HA        | prolyl 4-hydroxylase subunit alpha 1                       | 1.06        | 1.15        |
| 5327    | PLAT     | tPA         | plasminogen activator, tissue type                         | 1.28        | 1.05        |
| 5328    | PLAU     |             | plasminogen activator, urokinase                           | 1.05        | 1.20        |
| 5329    | PLAUR    | CD87        | plasminogen activator, urokinase receptor                  | 1           | -1.15       |
| 26499   | PLEK2    |             | pleckstrin 2                                               | 1.29        | -1.20       |
| 10631   | POSTN    |             | periostin                                                  | -1.12       | -1.07       |
| 5578    | PRKCA    | PKCa        | protein kinase C alpha                                     | -1.01       | 1.02        |
| 5806    | PTX3     |             | pentraxin 3                                                | 1.06        | 1.14        |
| 8434    | RECK     |             | reversion inducing cysteine rich protein with kazal motifs | -1.07       | 1.13        |
| 6275    | S100A4   |             | S100 calcium binding protein A4                            | <b>2.73</b> | 1.08        |
| 5054    | SERPINE1 |             | serpin family E member 1                                   | 1.27        | -1.11       |
| 5270    | SERPINE2 |             | serpin family E member 2                                   | 1.11        | -1.15       |
| 6696    | SPP1     | Osteopontin | secreted phosphoprotein 1                                  | 1.00        | -3.70       |
| 6722    | SRF      |             | serum response factor                                      | 1.26        | -1.07       |
| 5552    | SRGN     | PPG         | serglycin                                                  | 1.06        | 1.14        |
| 6876    | TAGLN    | SM22        | transgelin                                                 | 1.32        | -1.22       |
| 7168    | TPM1     |             | tropomyosin 1 (alpha)                                      | 1.27        | -1.06       |
| 7846    | TUBA1A   |             | tubulin alpha 1a                                           | 1.15        | -1.17       |
| 1462    | VCAN     |             | versican                                                   | -1.27       | -1.34       |
| 7431    | VIM      |             | vimentin                                                   | -1.06       | 1           |
